# Supplementary material for: Contrast-Based Fully Automatic Segmentation of White Matter Hyperintensities: Method and Validation
Source: PLoS One. 2012 Nov 12;7(11):e48953. doi: 10.1371/journal.pone.0048953 (PMC3495958; doi:10.1371/journal.pone.0048953)
Supplement: Appendix S1 — Computation of the weights for spatial coordinates. (DOC) [file pone.0048953.s001.doc]

# Appendix S1 - Computation of the weights for spatial coordinates

kNN uses Euclidian distance to compute the k-nearest neighbours and kernel of the SVM.

Given two vectors X and Y of dimension d, the Euclidian distance is written as:

Suppose the feature vector is composed of spatial information (3 coordinates) and information from two MR sequences, e.g. T1 and FLAIR, with N the number of voxels extracted from one modality (i.e. the size of the neighbourhood).

Let’s note pspatial, pT1, pFLAIR the associated weights when scaling the coordinates:

This yield to

If one wants the spatial information to have the same influence as one modality, this gives us:

And therefore for , one gets
